# Supplementary material for: Massive sediment pulses triggered by a multi-stage alpine cliff fall (Hochvogel, DE/AT)
Source: Copernicus journal article supplement (doi:10.5194/esurf-2023-10), 2023-04-26
Supplement: Supplementary file 1 [file esurf-2023-10-supplement.pdf]

# Supplementary information to “Massive sediment pulses triggered by a multi-stage alpine cliff fall (Hochvogel, DE/AT)”

Natalie Barbosa<sup>1,2</sup>, Johannes Leinauer<sup>2</sup>, Juilson Jubanski<sup>3</sup>, Michael Dietze<sup>4,5</sup>, Ulrich Münzer<sup>6</sup>, Florian Siegert<sup>1,3</sup>, Michael Krautblatter<sup>2</sup>.

5 <sup>1</sup>Department of Earth and Environmental Sciences, Faculty of Earth Sciences, GeoBio Center, Ludwig-Maximilians-University, Munich, 80333, Germany.

<sup>2</sup>Chair of Landslide Research, Technical University of Munich, Munich, 80333, Germany

<sup>3</sup>3D RealityMaps GmbH, Munich, 81673, Germany

<sup>4</sup>Faculty of Geosciences and Geography, Georg-August-Universität Göttingen, Göttingen, 31073, Germany

10 <sup>5</sup>GFZ German Research Centre for Geosciences, Potsdam, 14473, Germany

<sup>6</sup>Department of Earth and Environmental Sciences, Section Geology, Ludwig-Maximilians-University, Munich, 80333, Germany.

Correspondence to: Natalie Barbosa ([barbosa@biologie.uni-muenchen.de](mailto:barbosa@biologie.uni-muenchen.de))

## 15 1. Multi-temporal quantification of surface change

### 1.1. Datasets

We used large format aerial imagery surveyed by the Bundesamt für Eich- und Vermessungswesen (BEV); the Landesamt für Digitalisierung, Breitband und Vermessung (LDBV); and the company 3D RealityMaps. Detail  
20 information on the aerial surveys is listed in Table 1.

**Table 1. Detail information on the aerial surveys. Bundesamt für Eich- und Vermessungswesen (BEV). Landesamt für Digitalisierung, Breitband und Vermessung (LDBV)**

| Year        | Source      | Date                                                    | Coverage (km <sup>2</sup> ) | Image overlap | Resolution   | Camera (focal length mm)         |
|-------------|-------------|---------------------------------------------------------|-----------------------------|---------------|--------------|----------------------------------|
| 2009        | LDBV        | 29.07.2009                                              | 36 km <sup>2</sup>          | 80:50         | 20 cm        | UltraCam- X (100.5)              |
| 2010        | BEV         | 12.09.2010                                              | 48                          | 80:60         | 20 cm        | UltraCam-Xp (100.5)              |
| 2012        | LDBV        | 20.08.2012                                              | 45 km <sup>2</sup>          | 80:50         | 20 cm        | UltraCam- XP (100.5)             |
| 2014        | BEV         | 23.09.2014                                              | 48                          | 80:60         | 20 cm        | UltraCam-Eagle M1 (100.5)        |
| 2015        | LDBV        | 30.06.2015,<br>01.07.2015                               | 55 km <sup>2</sup>          | 80:50         | 20 cm        | UltraCam XP (100.5)              |
| 2017        | BEV         | 07.08.2017                                              | 125.10                      | 80:60         | 20 cm        | UltraCam-Eagle M1 (100.5)        |
| <b>2018</b> | <b>3DRM</b> | <b>20.9.2018</b><br><b>21.9.2018</b>                    | <b>48 km<sup>2</sup></b>    | <b>80:70</b>  | <b>10 cm</b> | <b>UltraCam-Eagle M2 (100.5)</b> |
| 2020        | LDBV        | 27.07.2020,<br>28.07.2020,<br>21.08.2020,<br>04.09.2020 | 55.77                       | 80:50         | 20 cm        | UltraCam-Eagle M3 (100.5)        |

## 1.2. 3D-coregistration evaluation

The 3D-coregistration successfully align the datasets within a spatial uncertainty close to the spatial resolution.

25 Table 2 summarizes the metrics used to later estimate the critical thresholds for change detection.

**Table 2. Assessment of the 3D-coregistration for each dataset.**

| Time periods of change | N points | RMSE  | RMSE X    | RMSE Y | RMSE Z |
|------------------------|----------|-------|-----------|--------|--------|
| 2010                   | 25       | 0.203 | 0.074     | 0.086  | 0.168  |
| 2012                   | 19       | 0.203 | 0.078     | 0.102  | 0.157  |
| 2014                   | 13       | 0.211 | 0.118     | 0.132  | 0.113  |
| 2015                   | 17       | 0.197 | 0.072     | 0.086  | 0.162  |
| 2017                   | 30       | 0.191 | 0.103     | 0.091  | 0.133  |
| 2018                   |          |       | Reference |        |        |
| 2020                   | 27       | 0.136 | 0.064     | 0.047  | 0.11   |

30 Additionally, we independently evaluate the elevation uncertainty after the 3D-coregistration using additional 30 independent well-distributed points on stable areas with a complex topography and close to the area of interest. The location of the points is presented in Figure 1. The elevation uncertainty, measured as the RMSE of the elevation difference in stable areas with complex topography, ranges from 30 to 40 cm depending on the combination of datasets. The combination used for this publication is summarized in Table 3.

35 **Table 3. Elevation uncertainty**

| Time periods of change | Z_RMSE |
|------------------------|--------|
| 2010-2012              | 0.343  |
| 2012-2014              | 0.335  |
| 2014-2015              | 0.296  |
| 2015-2017              | 0.375  |
| 2017-2018              | 0.382  |
| 2018-2020              | 0.297  |

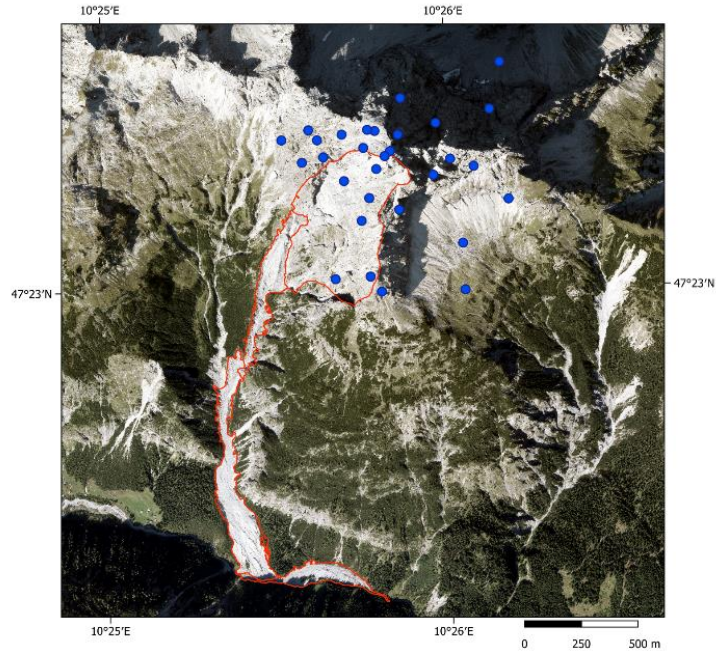

40 **Figure 1. Distribution of points to assess the elevation uncertainty after the 3D-coregistration. We decided to focus on the upper slope because is the area with the highest theoretical uncertainty due to topography complexity.**

The proposed 3D-coregistration workflow resulted in consistent landscape representations through time evidenced by topographic profiles extracted from the DSM. Profiles at strategic locations support the interpretation of the sediment cascades (Figure 2).

45

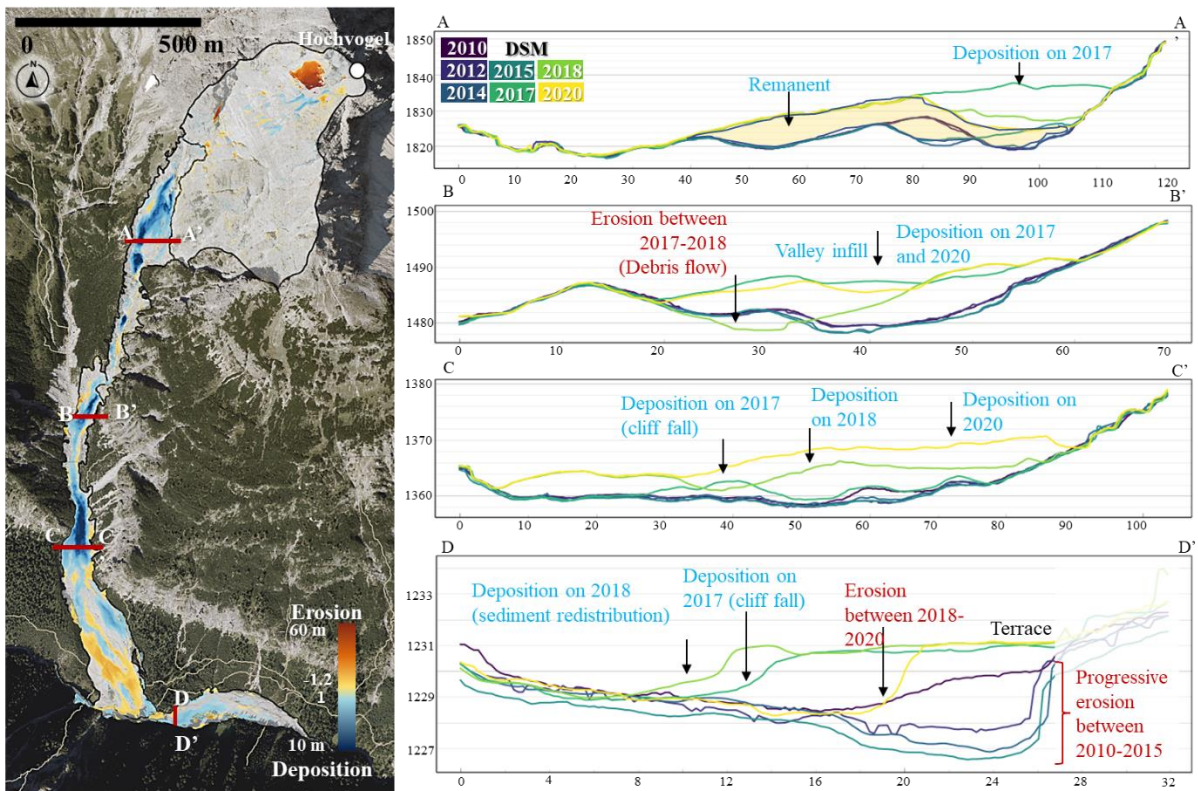

**Figure 2. Topographic profiles at retention basins. Left: Cumulative topographic changes between 2010 and 2020. Dark blue areas indicate remaining sediment deposits with more than 10m in elevation. Profile A-A' shows the formation of a depositional geform (sediment talus) which is partially eroded in the next few years. Blue polygon highlights the**

50 remanent sediment wedge with a depth of c.a. 10 m. Profile B-B' is located in the transfer zone between the Weittal  
 valley and the lower valley. The confined valley is filled with sediment transferred from the cliff fall in 2017, partially  
 eroded between 2017-2018, and filled again with sediment produced by secondary rockfalls and debris flows in 2020.  
 Profile C-C' exhibits the dynamic of the confined fan apex which is slightly affected by the primary sediment produced  
 55 during the cliff event but heavily impacted by the cascades. Progressive aggradation since 2017 evidenced the sediment  
 waves in the system. Profile D-D', shows the formation and current erosion of a terrace formed as a result of the  
 sediment that reached the outlet of the Wildenbach catchment. An initial sediment wave blocked partially the Jochbach  
 river by c.a. 3 m of sediment. Additional sediment was annexed to the terrace in 2018. Currently, a remnant of 3 m.  
 width is observed, less than half of the original terrace.

### 1.3. Critical thresholds

#### 60 1.3.1. Frequency-magnitude curves

The polygons interpreted as primary and secondary rockfalls used for the construction of the decadal frequency-  
 magnitude curves are based on the segmentation according to the critical thresholds determined by best practice  
 and summarized in Table 4.

65 **Table 4. Critical threshold for the four slopes that constitute the Hochvogel summit.**

|            | northern slope | western slope | southwestern<br>slope | southeastern slope |
|------------|----------------|---------------|-----------------------|--------------------|
| Erosion    | 1              | 1             | 1                     | 1                  |
| Deposition | 0.33           | 0.5           | 0.6                   | 0.6                |

#### 1.3.2. Cascading geomorphic sediment budgets

70 A sediment budget describes the input, transport, storage, and export of sediment in a geomorphic system. This  
 concept provides an effective basis for representing the key components of the sediment delivery system within a  
 catchment and for assembling the necessary data to elucidate, understand and predict catchment sediment delivery  
 (Walling and Collins, 2008) and estimate related natural hazards. The geomorphic sediment budget (Wheaton et  
 al., 2010a) is calculated as the sum of the masked DoD values of erosion (negative change) and deposition  
 75 (positive change).

$$Q_{b_{in}} - Q_{b_{out}} = \frac{\Delta V_{DoD}}{\Delta t} \quad (1)$$

$$\Delta V_{DoD} = \sum V_{deposition} - \sum V_{erosion} \quad (2)$$

where  $Q_{b_{in}}$  is the sediment produced,  $Q_{b_{out}}$  is the sediment eroded, and  $\Delta V_{DoD}$  the change in storage in a given  
 timestamp calculated by Eq. (2). If  $\Delta V_{DoD}$  is positive, there is aggradation. If the  $\Delta V_{DoD}$  is negative, there is  
 80 degradation.

85

90 For each region and time interval, a critical threshold for erosion and deposition was determined by best practice and summarized in Table 5.

**Table 5. Critical threshold for each region and time interval.**

| Time interval | rockface |            | upper channelized debris flow channel |            | widened disperse debris flow channel |            | outlet  |            |
|---------------|----------|------------|---------------------------------------|------------|--------------------------------------|------------|---------|------------|
|               | Erosion  | Deposition | Erosion                               | Deposition | Erosion                              | Deposition | Erosion | Deposition |
| 2010-2012     | -1       | 0.33       | -0.6                                  | 0.34       | -0.6                                 | 0.4        | -0.22   | 0.22       |
| 2012-2014     | -0.8     | 0.34       | -0.6                                  | 0.33       | -0.4                                 | 0.4        | -0.2    | 0.2        |
| 2014-2015     | -0.4     | 0.8        | -0.8                                  | 0.8        | -0.45                                | 0.3        | -0.4    | 0.2        |
| 2015-2017     | -1       | 0.6        | -1                                    | 0.6        | -0.4                                 | 0.5        | -0.2    | 0.2        |
| 2017-2018     | -1.2     | 0.4        | -0.8                                  | 0.4        | -0.4                                 | 0.4        | -0.2    | 0.2        |
| 2018-2020     | -0.3     | 0.6        | -0.3                                  | 0.6        | -0.3                                 | 0.6        | -0.2    | 0.2        |

95 1.4. 2016 cliff fall event

The volume inside a manually delimited extent of the cliff fall resulted in a mean of 142,175 m<sup>3</sup> and a standard deviation of 3 458 m. The volume calculated for all possible combinations of time intervals is summarized in Table 6.

**Table 6. 2.5. volume calculation of the cliff fall occurred in 2016 for each possible time-stamp combination. The calculation has been done based on a polygon delimitation.**

100

| 2017 combinations | Volume (m <sup>3</sup> ) | 2018 combinations | Volume (m <sup>3</sup> ) | 2020 combinations | Volume (m <sup>3</sup> ) |
|-------------------|--------------------------|-------------------|--------------------------|-------------------|--------------------------|
| 2017-2009         | -139,326                 | 2018-2009         | -136,328                 | 2020-2009         | -140,535                 |
| 2017-2010         | <b>-147,471</b>          | 2018-2010         | <b>-144,201</b>          | 2020-2010         | <b>-148,759</b>          |
| 2017-2012         | -140,738                 | 2018-2012         | -137,940                 | 2020-2012         | -141,992                 |
| 2017-2014         | -141,892                 | 2018-2014         | -138,697                 | 2020-2014         | -143,123                 |
| 2017-2015         | -144,085                 | 2018-2015         | -140,842                 | 2020-2015         | -145,364                 |

## 2. Multi-stage detachment analysis

We estimate the seismic volumes following the methodology described in Le Roy et al., 2019. They determined a relation between seismic energy  $E_s$  caused by a rock fall and its initial potential energy  $E_p$  expressed by Eq. 3:

105

$$E_s = aE_p^b \quad (3)$$

with  $a = 10^{-8}$  and  $b = 1.55$

With this relation, the source volume can be calculated by Eq. 4:

$$V = \frac{E_s \frac{1}{b}}{agpH} \quad (4)$$

110 where  $g$  is the gravity constant ( $9.81 \text{ m s}^{-2}$ ),  $p$  is the density of the rock fall material and  $H$  is the fall height of the fallen block.

We calculated the seismic Energy  $E_s$  following the equations 5,6 and 7, in Le Roy et al., 2019:

$$E_s = 2\pi r p h c \int_{t_0}^{t_1} u_{env}(t)^2 e^{\alpha r} \varepsilon dt \quad (5)$$

$$u_{env}(t) = \sqrt{u(t)^2 + H(u(t)^2)} \quad (6)$$

$$u(t) = \sqrt{u_E^2(t) + u_N^2(t) + u_Z^2(t)} \quad (7)$$

115 with  $r$  being the distance between seismic station and rock fall impact,  $h$  being the thickness of the layer through which the surface waves traveled,  $c$  being the velocity of the seismic waves,  $t_0$  and  $t_1$  being the start and end times of the impact signal,  $u_{env}(t)$  being the envelope of the ground velocity  $u(t)$  determined via the Hilbert transform  $H$ ,  $\alpha$  being an attenuation factor accounting for the inelastic attenuation of the waves and  $\varepsilon$  being a site effect coefficient.

## 120 2.1. Seismic stations

We used 7 seismic broadband stations from the Austrian and Bavarian earthquake observatories listed in Table 7.

**Table 7. Seismic stations. Abbreviation of sensor type according to *eseis* package (Dietze, 2018a).**

| ID    | name          | x       | y         | z    | sensor_type | network         |
|-------|---------------|---------|-----------|------|-------------|-----------------|
| OBER  | Oberstdorf    | 597 551 | 5 251 204 | 896  | LE3D5S      | BW <sup>1</sup> |
| PART  | Partenkirchen | 659 143 | 5 262 560 | 760  | LE3D5S      | BW <sup>1</sup> |
| ZUGS  | Zugspitze     | 649 280 | 5 253 292 | 2650 | L4C         | BW <sup>1</sup> |
| DAVA  | Damuels       | 566 566 | 5 237 400 | 1602 | STS2        | OE <sup>2</sup> |
| MOTA  | Moosalm       | 658 900 | 5 245 627 | 1575 | STS2        | OE <sup>2</sup> |
| RETA  | Reutte        | 632 755 | 5 260 801 | 965  | STS2        | OE <sup>2</sup> |
| A037A | Verwall       | 595 994 | 5 213 757 | 2020 | TC120s      | Z3 <sup>3</sup> |

125 <sup>1</sup> Department of Earth and Environmental Sciences, Geophysical Observatory, University of Munchen. (2001) via <http://erde.geophysik.uni-muenchen.de/fdsnws/station/1/query?>

<sup>2</sup> ZAMG - Zentralanstalt für Meteorologie und Geodynamik. (1987) via <http://www.orfeus-eu.org/fdsnws/station/1/query?>

<sup>3</sup> AlpArray Seismic Network (2015) via <https://erde.geophysik.uni-muenchen.de/fdsnws/dataselect/1/query?>

130 2.2. Event detection

Using the knowledge of rockfall activity at the Hochvogel flank between July 9<sup>th</sup> and 11<sup>th</sup> 2016, we examined the seismic signals of all stations during this time period. By analyzing the local seismic amplitude and the corresponding spectrograms at each station, we identified all seismic events with the strongest impact at the closest station in Oberstdorf. Rock falls produce a seismic impact over all frequencies between 5 and 50 Hz (Le Roy et al., 2019); We only included events where there is a clear decrease in seismic intensity with increasing distance of the stations from the Hochvogel (strongest in OBER, then RETA, then DAVA) and significant arrival time differences of up to 20 s (first in OBER, then RETA, then A037A, then DAVA) (Figure 3). We excluded earthquakes based on distinct arrivals of P and S waves, a lower frequency content, and small signal arrival times differences between the stations. Most earthquakes could also be linked to an event in the regional and global earthquake event records. Local anthropogenic noise could be identified by higher frequency contents and missing coincidence of the signals between different stations. Following these criteria, we identified all seismic signals potentially originating from the rock fall series at the Hochvogel. We assured the origination of the seismic events at the Hochvogel due to the fact that all signals decay with increasing distance of the station from the Hochvogel, the overall similar arrival time delay patterns, and their coincidence to personal rock fall activity observations by hikers during the analyzed time period.

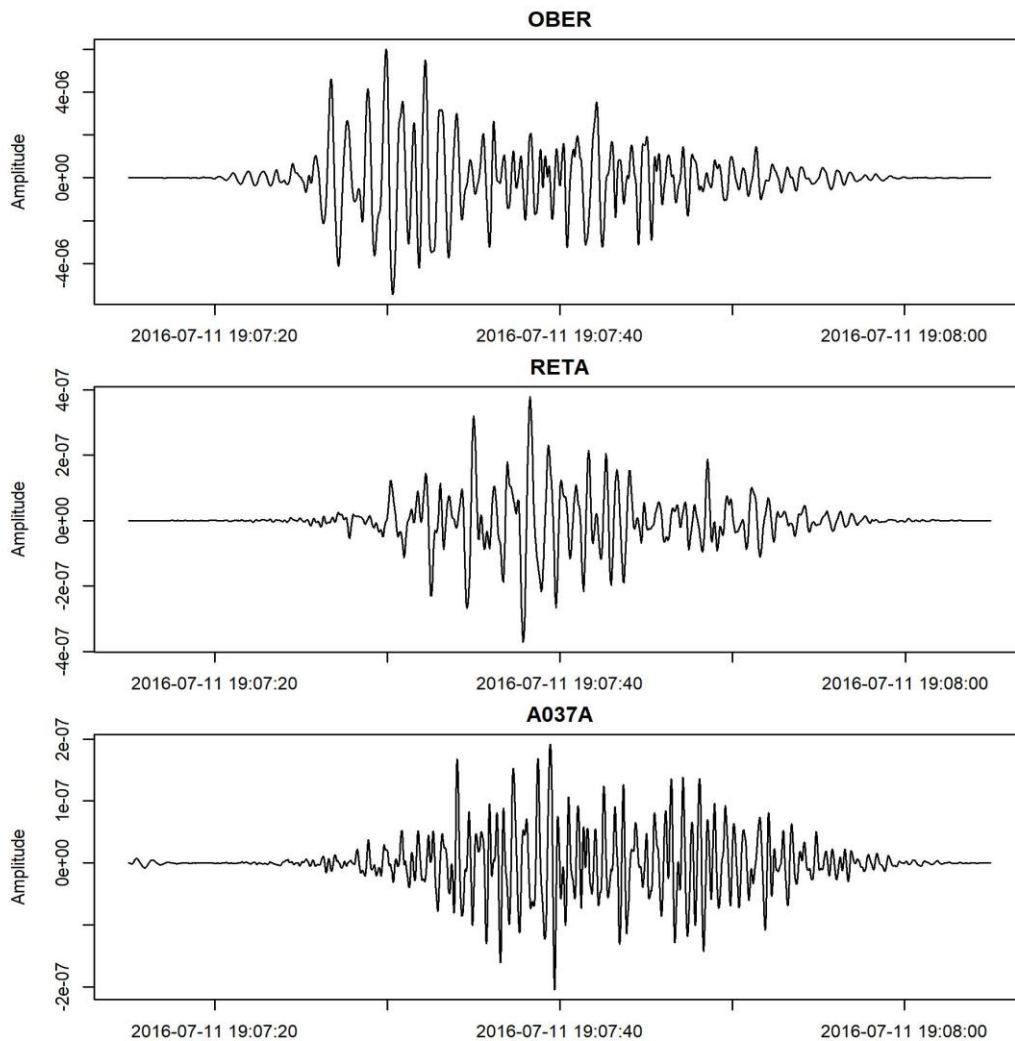

**Figure 3. Seismograms of a rockfall. The intensity of the seismic energy decreases and arrival times increase with increasing distance of the stations from the Hochvogel (strongest in OBER, then RETA, then A037A).**

150 **Table 8. Summary of the rockfalls identified between 9<sup>th</sup> and 11<sup>th</sup> of July**

| event | First arrival time at OBER in UTC | status                    |
|-------|-----------------------------------|---------------------------|
| 1     | 2016-07-09 08:37:45               | probably rock fall signal |
| 2     | 2016-07-09 17:39:27               | probably rock fall signal |
| 3     | 2016-07-11 17:39:36               | probably rock fall signal |
| 4     | 2016-07-11 18:48:13               | clearly rock fall signal  |
| 5     | 2016-07-11 19:05:19               | clearly rock fall signal  |
| 6     | 2016-07-11 19:07:16               | clearly rock fall signal  |

The latest three seismic events show clear evidence for originating from the Hochvogel rock failure, while the first three events are harder to constrain due to their smaller amplitude. Nevertheless, these also show the same intensity decay and arrival time patterns at the closest stations and can therefore be taken into account. For the parameter estimation, we only used the clear events [4,5,6] in Table 8.

155 2.3. Parameter estimation

*r (distance)*

The distance of the seismic stations to the source rock fall at the Hochvogel has been calculated as topography corrected distance using *spatial\_migrate()* from the *eseis* package (Dietze, 2018a, b) The results are listed in Table 9.

160 **Table 9. Distance of each seismic station from the Hochvogel.**

| ID    | distance [m] |
|-------|--------------|
| OBER  | 11,783       |
| PART  | 54,696       |
| ZUGS  | 41,344       |
| DAVA  | 43,173       |
| MOTA  | 53,916       |
| RETA  | 27,433       |
| A037A | 39,224       |

*p (density)*

We assume a ground density of the carbonate rock to  $2500 \pm 100 \text{ kg m}^{-3}$ .



## 165 *c* (velocity)

The main seismic energy is transported by the surface waves and not the fastest P-waves. We, therefore, estimated the relevant seismic velocity based on the timing of the peak ground velocity and peak envelope value at each station (vertical component) filtered between 1 and 2 Hz (to avoid timely differences and distortion in higher frequencies). The velocity is found by the linear regression of the time difference and the distance difference for each station pair as  $1715 \pm 99 \text{ m s}^{-1}$  (Figure 4).

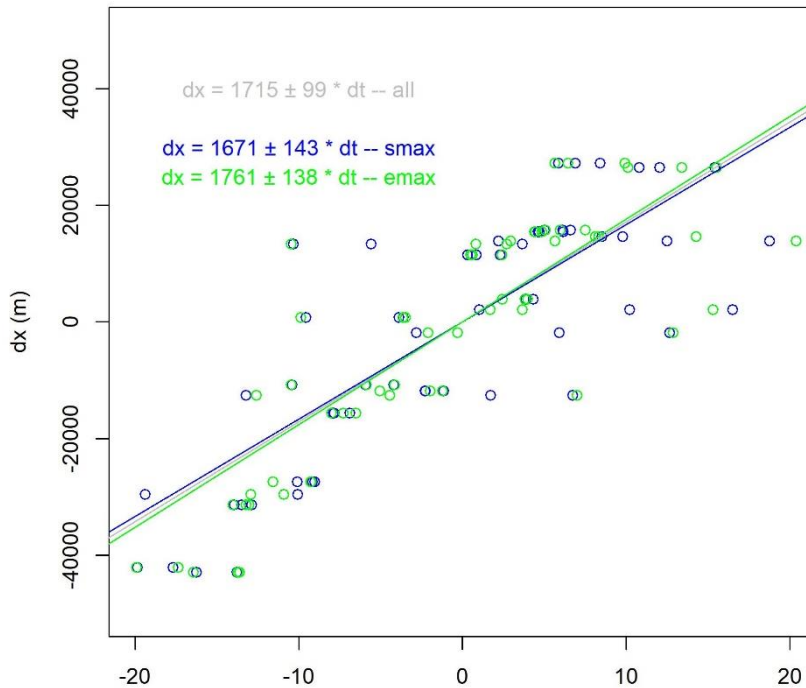

**Figure 4. Linear regression for the estimation of the parameter *c* (velocity)**

## *h* (thickness of layer)

The centroid frequency ( $f_{\text{centroid}}$ ) of the seismic signals is  $4.93 \pm 0.92 \text{ Hz}$  (calculated with *signal\_stats()* from *eseis*). We, therefore, estimated the thickness of the layer through which the surface waves travel as one Rayleigh wavelength with  $h = c/f_{\text{centroid}}$ .

## *t0* and *t1*

Onset and end times of seismic events have been picked manually from the filtered seismograms.

## *u<sub>env</sub>* (envelope)

180 The envelope of the seismic signal has been calculated using the *signal\_envelope()* function from the *eseis* package.

## $\epsilon$ (site effect coefficient)

We used the 10 strongest earthquakes of 2016 recorded by all stations (Table 10) to estimate the amplitude correction of each station relative to the OBER station (reference station,  $\epsilon = 1$ ).  $\epsilon$  has been set as the mean ratio

185 of peak signal envelope relative to OBER in the vertical component (filtered between 2 and 6 Hz containing the most energy around the frequency centroid). The results are listed in Table 11.

**Table 10. Earthquakes used for the calculation of the parameter  $\varepsilon$  (site effect coefficient). Data source: USGS (2022)**

| Magnitude. | Location           | Depth [km] | Origin time (UTC)   | Region                   |
|------------|--------------------|------------|---------------------|--------------------------|
| 7.9        | 4.505°S 153.522°E  | 94.5       | 2016-12-17 10:51:10 | Kokopo, Papua New Guinea |
| 7.8        | 42.737°S 173.054°E | 15.1       | 2016-11-13 11:02:56 | Amberley, New Zealand    |
| 7.8        | 0.382°N 79.922°W   | 20.6       | 2016-04-16 23:58:36 | Muisne, Ecuador          |
| 7.8        | 4.952°S 94.330°E   | 24.0       | 2016-03-02 12:49:48 | Sumatra, Indonesia       |
| 7.7        | 18.543°N 145.507°E | 196.0      | 2016-07-29 21:18:24 | Northern Mariana Islands |
| 7.4        | 55.285°S 31.877°W  | 10.0       | 2016-08-19 07:32:22 | South Georgia Island     |
| 7.2        | 22.477°S 173.117°E | 16.4       | 2016-08-12 01:26:36 | Loyalty Islands          |
| 7.2        | 56.241°S 26.935°W  | 78.0       | 2016-05-28 09:46:59 | South Sandwich Islands   |
| 7.2        | 53.978°N 158.546°E | 177.0      | 2016-01-30 03:25:12 | Mil'kovo, Russia         |
| 7.1        | 0.046°S 17.826°W   | 10.0       | 2016-08-29 04:29:57 | Ascension Island         |

190 **Table 11. Summary of the estimated values for the parameter  $\varepsilon$  (site effect coefficient) for each seismic station.**

| ID    | $\varepsilon$ (mean) | $\varepsilon$ (sd) |
|-------|----------------------|--------------------|
| OBER  | 1.000000             | 0.000000           |
| PART  | 1.333635             | 0.4460248          |
| ZUGS  | 2.870155             | 1.4927984          |
| DAVA  | 3.032414             | 0.5136714          |
| MOTA  | 3.730635             | 1.6229273          |
| RETA  | 5.529136             | 1.1359063          |
| A037A | 3.086086             | 1.3231271          |

***a* (attenuation factor)**

The attenuation factor has been estimated following the description of Le Roy et al. (2019) with a correction of the index  $i$  and  $j$  following Kanai et al. (1984) using the 3 rock fall events [4,5,6] and filtered vertical components between 2 and 6 Hz containing the most energy up to the frequency centroid:

$$\log_e \left[ \frac{a_i \varepsilon_j}{a_j \varepsilon_i} \left( \frac{r_i}{r_j} \right)^n \right] = -\alpha (r_i - r_j) \quad (8)$$

With  $\alpha$  being the amplitude of a station pair  $i$  and  $j$ ,  $n$  being 0.5 for surface waves and  $\alpha$  being the attenuation factor.  $\alpha$  has then been determined by a linear regression of the logarithm term and  $(r_i - r_j)$  (Figure 5).

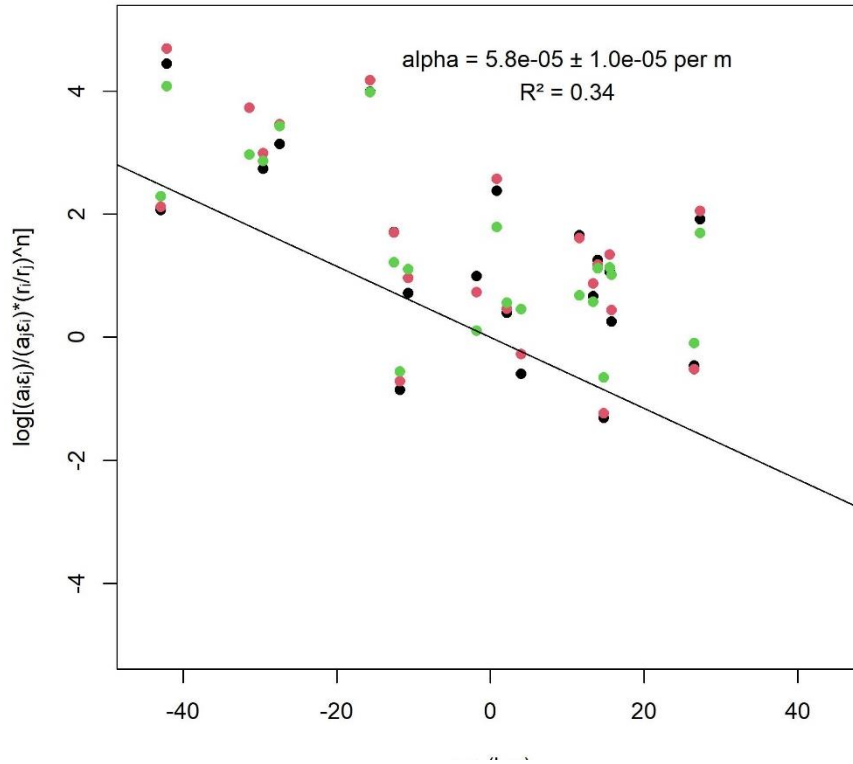

200 **Figure 5. Linear regression for the estimation of the parameter  $\alpha$  (attenuation factor)**

### *H (fall height)*

The fall height has been estimated by analyzing the 3D point clouds and DEM differences. A simple toppling of the center of gravity towards the slope corresponds to a fall height of 50-60 m while a sliding of the failed block suggests a probable fall height of 75 to 100 m.

### 205 2.4. Error estimation

All parameters have been estimated with a range or as mean with standard deviation. To estimate the error of the final volume calculation, we used 1,000 iterations of a Monte Carlo simulation, where  $p$  is picked as a random deviate between the min and max values and  $c$ ,  $h$ ,  $\alpha$  and  $\varepsilon$  are randomly generated values with the respective mean and standard deviation. This allows us to give a statistical range for the result of each sub-event at each station.

210 Additionally, we calculated the volume for all stations, although OBER is the closest station and therefore, the results are most reliable here.

### 2.5. Results

The stations PART and ZUGS had to be excluded due to the bad signal-to-noise ratio of the rock fall signal. The volume estimation for each sub-event is summarized in Figure 6 and Table 12.

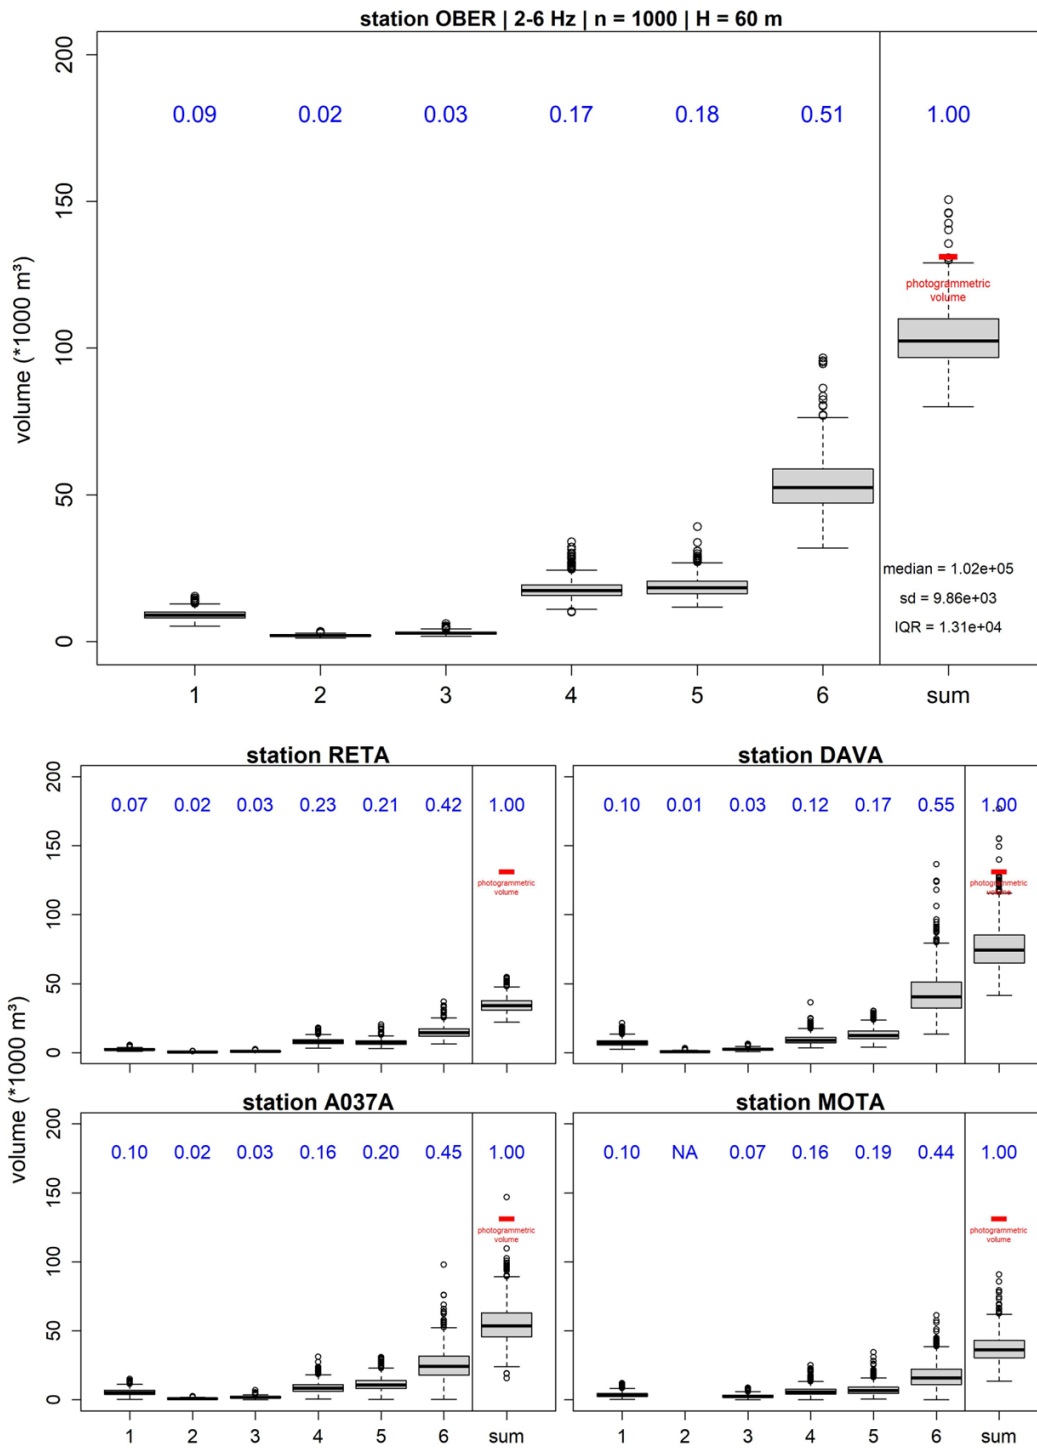

Figure 6. Volume estimation for each sub-event using a Monte-Carlo simulation with 1,000 iterations for each seismic station.

**Table 12. Cumulative median total volume for each seismic station for different fall heights.**

| fall height [m] | OBER    |        | RETA   |       | DAVA   |        | A037A  |        | MOTA   |        | MEAN          |
|-----------------|---------|--------|--------|-------|--------|--------|--------|--------|--------|--------|---------------|
|                 | median  | sd     | median | sd    | median | sd     | median | sd     | median | sd     |               |
| 50              | 122,946 | 11,826 | 40,922 | 6,254 | 89,157 | 20,050 | 64,349 | 16,506 | 43,433 | 12,658 | <b>72,161</b> |
| 60              | 102,455 | 9,855  | 34,101 | 5,211 | 74,297 | 16,709 | 53,624 | 13,755 | 36,194 | 10,548 | <b>60,134</b> |
| 75              | 81,964  | 7,884  | 27,281 | 4,169 | 59,438 | 13,367 | 42,899 | 11,004 | 28,955 | 8,438  | <b>48,107</b> |
| 100             | 61,473  | 5,913  | 20,461 | 3,127 | 44,578 | 10,025 | 32,174 | 8,253  | 21,716 | 6,329  | <b>36,081</b> |

For all other stations, the respective sub-event’s percentage of the total volume is very similar (Table 13). The stations further away than OBER underestimate the volume due to stronger signal damping, distortion, and worse coupling compared to the closest station OBER.

**Table 13. Percentage of the total volume per seismic station**

|              | OBER | RETA | DAVA | A037A | MOTA | MEAN |
|--------------|------|------|------|-------|------|------|
| sub-event #1 | 0.09 | 0.07 | 0.1  | 0.1   | 0.1  | 0.09 |
| sub-event #2 | 0.02 | 0.02 | 0.01 | 0.02  | 0.00 | 0.01 |
| sub-event #3 | 0.03 | 0.03 | 0.03 | 0.03  | 0.07 | 0.04 |
| sub-event #4 | 0.17 | 0.23 | 0.12 | 0.16  | 0.16 | 0.17 |
| sub-event #5 | 0.18 | 0.21 | 0.17 | 0.2   | 0.19 | 0.19 |
| sub-event #6 | 0.51 | 0.42 | 0.55 | 0.45  | 0.44 | 0.47 |

230

**References**

235

AlpArray Seismic Network, AlpArray Seismic Network (AASN) temporary component. [Data set] AlpArray Working Group. Other/Seismic Network. [https://doi.org/10.12686/alparray/z3\\_2015](https://doi.org/10.12686/alparray/z3_2015), 2015

Dietze, M.: “eseis” - a comprehensive R software toolbox for environmental seismology, GFZ Data Services, 2018a.

240

Department of Earth and Environmental Sciences, Geophysical Observatory, University of Munchen. BayernNetz [Data set]. International Federation of Digital Seismograph Networks. <https://doi.org/10.7914/SN/BW>, 2001.

Dietze, M.: The R package *eseis* – a comprehensive software toolbox for environmental seismology, *Earth Surf. Dynam.*, 1–28, <https://doi.org/10.5194/esurf-2017-75>, 2018b.

Kanai, K., Yamabe, K., and Habasaki, A.: Study of the attenuation of seismic waves, in: *Proceedings of the Eighth World Conference on Earthquake Engineering*, 273–280, 1984.

245 Le Roy, G. L., Helmstetter, A., Amitrano, D., Guyoton, F., and Roux-Mallouf, R. L.: Seismic Analysis of the Detachment and Impact Phases of a Rockfall and Application for Estimating Rockfall Volume and Free-Fall Height, *J Geophys Res Earth Surf.*, 124, 2602–2622, <https://doi.org/10.1029/2019jf004999>, 2019.

U.S. Geological Survey (2022), Earthquake Catalogue, accessed 2022-12-08 at URL <https://earthquake.usgs.gov/earthquakes/map/?extent=-89.74899,->

250 [382.5&extent=89.74589,742.5&range=search&timeZone=utc&search=%7B%22name%22:%22Search%20Results%22,%22params%22:%7B%22starttime%22:%222016-07-01%2000:00:00%22,%22endtime%22:%222016-07-31%2023:59:59%22,%22minmagnitude%22:2.5,%22orderby%22:%22time%22%7D%7D](https://earthquake.usgs.gov/earthquakes/map/?extent=-89.74899,-382.5&extent=89.74589,742.5&range=search&timeZone=utc&search=%7B%22name%22:%22Search%20Results%22,%22params%22:%7B%22starttime%22:%222016-07-01%2000:00:00%22,%22endtime%22:%222016-07-31%2023:59:59%22,%22minmagnitude%22:2.5,%22orderby%22:%22time%22%7D%7D)

ZAMG - Zentralanstalt für Meteorologie und Geodynamik, Austrian Seismic Network [Data set]. International Federation of Digital Seismograph Networks. <https://doi.org/10.7914/SN/OE>, 1987.

255
